# Supplementary material
Source: MDPI journal article supplement (https://www.mdpi.com/2073-4344/13/3/457)
Supplement: s1 [file s1]

## **Supplementary materials**

### **The quick removal of toxic dye molecules by an efficient adsorptive BiOI/Bi<sub>2</sub>MoO<sub>6</sub> heterostructure**

#### **Authors**

Tasie Ebenezer Onyedika<sup>†</sup>, Mengying Xu<sup>†</sup>, Yichao Deng, Yang Liu, Lian Li, Pier-Luc Tremblay\*, Tian Zhang\*

\*Corresponding authors: [tzhang@whut.edu.cn](mailto:tzhang@whut.edu.cn), [pierluct@whut.edu.cn](mailto:pierluct@whut.edu.cn)

<sup>†</sup>These authors contributed equally to this work.

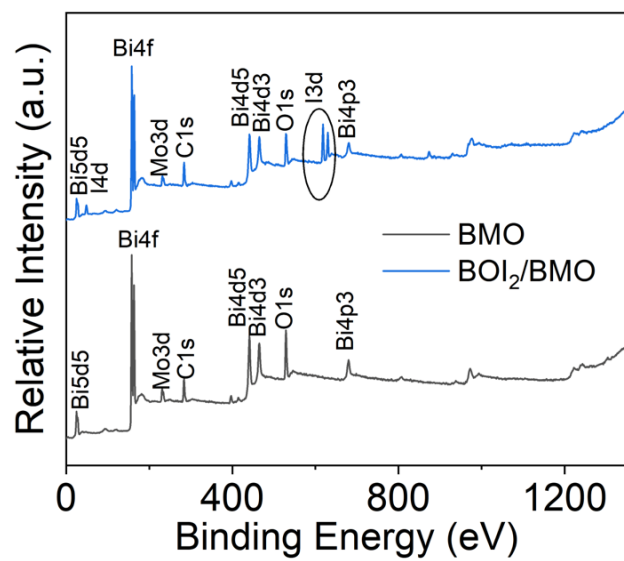

**Figure S1.** XPS survey spectra for BMO and BOI<sub>2</sub>/BMO.

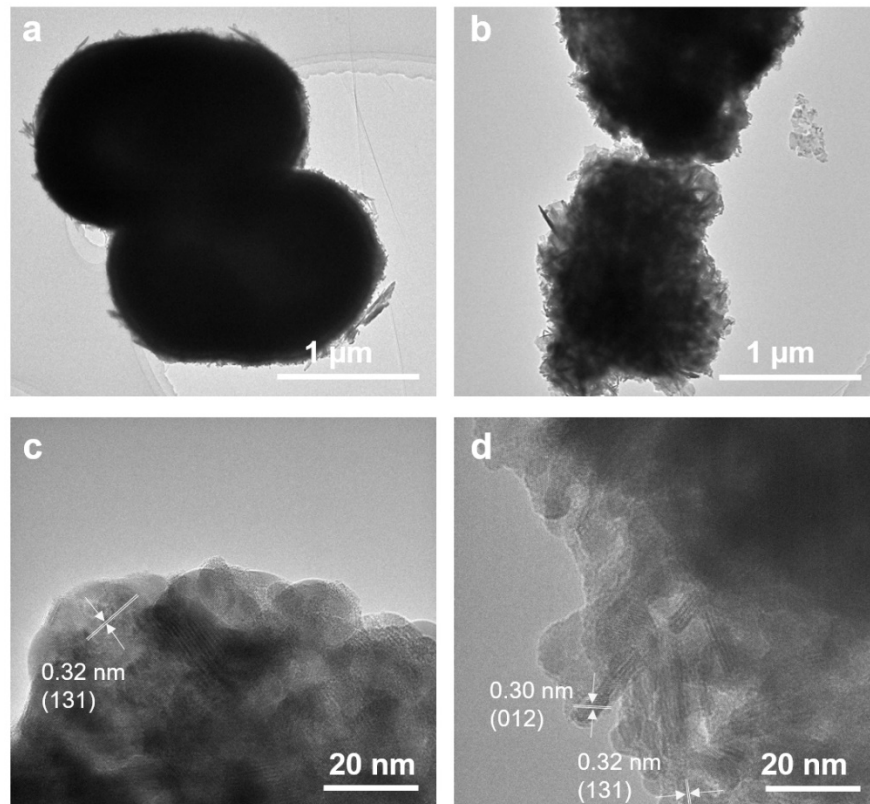

**Figure S2.** TEM micrographs of (a) BMO and (b) BOI<sub>2</sub>/BMO. HRTEM micrographs of (c) BMO and (d) BOI<sub>2</sub>/BMO.

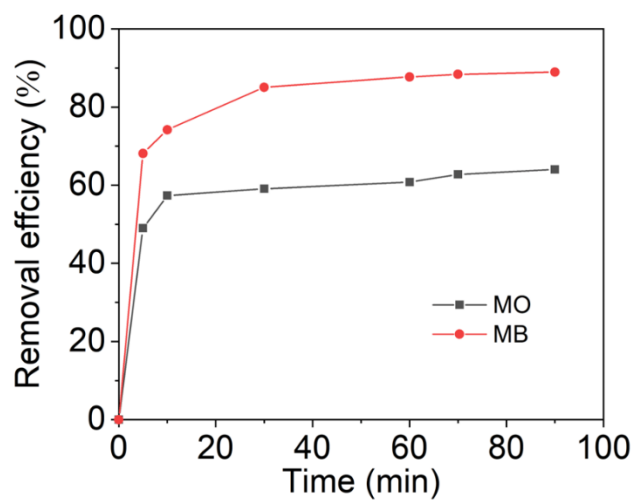

**Figure S3.** Dark adsorption by BOI<sub>2</sub>/BMO (50 mg) of MO (10 mg/L) and MB (10 mg/L).

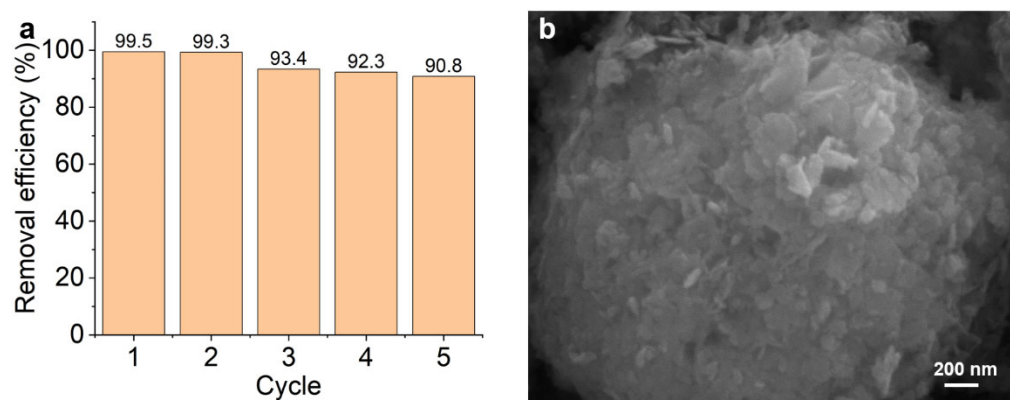

**Figure S4.** (a) Cycling experiment for the dark adsorption of RhB by BOI<sub>2</sub>/BMO. (b) SEM micrograph of BOI<sub>2</sub>/BMO after 5 cycles of RhB adsorption.

**Table S1.** Parameters for kinetic models of RhB adsorption by BOI<sub>2</sub>/BMO.

| <b>Model</b>        | <b>Parameter</b>           |       |
|---------------------|----------------------------|-------|
| pseudo-first-order  | $k_1$ (min <sup>-1</sup> ) | 0.090 |
|                     | $q_e$ (mg/g)               | 13.42 |
|                     | $R^2$                      | 0.781 |
| pseudo-second-order | $k_2$ (g/mg/min)           | 0.022 |
|                     | $q_e$ (mg/g)               | 24.58 |
|                     | $R^2$                      | 0.999 |

**Table S2.** Parameters for isotherms models of RhB adsorption by BOI<sub>2</sub>/BMO.

|              | <b>Langmuir</b>             |                             |                      |                      | <b>Freundlich</b>           |            |                      |
|--------------|-----------------------------|-----------------------------|----------------------|----------------------|-----------------------------|------------|----------------------|
| <b>T (K)</b> | <b>K<sub>L</sub> (L/mg)</b> | <b>q<sub>m</sub> (mg/g)</b> | <b>R<sup>2</sup></b> | <b>R<sub>L</sub></b> | <b>K<sub>F</sub> (L/mg)</b> | <b>1/n</b> | <b>R<sup>2</sup></b> |
| <b>298</b>   | 0.249                       | 72.72                       | 0.990                | 0.039                | 28.29                       | 0.21       | 0.988                |
| <b>308</b>   | 0.341                       | 53.53                       | 0.997                | 0.028                | 24.07                       | 0.181      | 0.997                |
| <b>318</b>   | 0.336                       | 48.57                       | 0.998                | 0.029                | 21.73                       | 0.179      | 0.984                |
